# Supplementary material
Source: PubMed Central journal article supplement (PMC5224885)
Supplement: ja6b08200_si_001.pdf [file ja6b08200_si_001.pdf]

Supporting information for

A >200 meV uphill thermodynamic landscape for radical  
transport in *E. coli* ribonucleotide reductase determined using  
fluorotyrosine-substituted enzymes

*Kanchana R. Ravichandran*<sup>†</sup>, *Alexander T. Taguchi*<sup>†</sup>, *Yifeng Wei*<sup>†</sup>, *Cecilia Tommos*<sup>§</sup>, *Daniel G.*

*Nocera*<sup>⊥\*</sup>, *JoAnne Stubbe*<sup>†,‡,\*</sup>

\*To whom correspondence should be addressed: [dnocera@fas.harvard.edu](mailto:dnocera@fas.harvard.edu), [stubbe@mit.edu](mailto:stubbe@mit.edu)

<sup>†</sup> Department of Chemistry and <sup>‡</sup> Department of Biology, Massachusetts Institute of Technology,  
77 Massachusetts Avenue, Cambridge, MA 02139, United States

<sup>§</sup> Department of Biochemistry and Biophysics, University of Pennsylvania, Philadelphia, PA  
19104, United States

<sup>⊥</sup> Department of Chemistry and Chemical Biology, Harvard University, 12 Oxford Street,  
Cambridge, MA 02138, United States

## SUPPORTING INFORMATION TABLE OF CONTENTS

Detailed description of data analysis using Method B

*Table S1:* Temperature dependence of  $Y_{356}\bullet$  formation: Hand-quench vs rapid freeze-quench

*Table S2:* The pH dependence of  $Y_{356}\bullet$  formation

*Table S3:* Temperature dependent equilibration of  $F_3Y_{122}\bullet$  and  $Y_{356}\bullet$  in the reaction of  $F_3Y_{122}\bullet$ - $\beta 2$ , CDP, ATP and  $Y_{731}F$ - $\alpha 2$  or  $Y_{730}F$ - $\alpha 2$

*Table S4:* Hyperfine values (MHz) for  $\beta$ - $^1H$  and  $^{19}F$  of  $F_2Y\bullet$  at different positions on pathway

*Figure S1:* Analysis by method B for one trial of the  $F_3Y_{122}\bullet$ - $\beta 2/Y_{731}F$ - $\alpha 2/CDP/ATP$  reaction as a function of temperature

*Figure S2:* Analysis by method B for one trial of the  $F_3Y_{122}\bullet$ - $\beta 2/Y_{731}F$ - $\alpha 2/CDP/ATP$  reaction as a function of pH

*Figure S3:* Composite EPR spectra of the  $F_3Y_{122}\bullet$ - $\beta 2/Y_{731}F$ - $\alpha 2/CDP/ATP$  reaction as a function of temperature (2–15 °C)

*Figure S4:* Composite EPR spectra of the  $F_3Y_{122}\bullet$ - $\beta 2/Y_{731}F$ - $\alpha 2/CDP/ATP$  reaction as a function of temperature (15–37 °C)

*Figure S5:* Temperature dependence of  $Y_{356}\bullet$  formation monitored by RFQ-EPR spectroscopy

*Figure S6:* Temperature dependence of  $Y_{356}\bullet$  formation in the reaction of  $F_3Y_{122}\bullet$ - $\beta 2/Y_{731}F$ - $\alpha 2/CDP/ATP$  as determined by HQ- and RFQ-EPR spectroscopies

*Figure S7:* Temperature dependent equilibration of  $F_3Y_{122}\bullet$  and  $Y_{356}\bullet$  in the reaction of  $F_3Y_{122}\bullet$ - $\beta 2$ , CDP, ATP and  $Y_{731}F$ - $\alpha 2$  or  $Y_{730}F$ - $\alpha 2$

*Figure S8:* Composite EPR spectra of the  $F_3Y_{122}\bullet$ - $\beta 2/Y_{731}F$ - $\alpha 2/CDP/ATP$  reaction at 25 °C as a function of pH

*Figure S9:* Composite EPR spectra of the  $F_3Y_{122}\bullet$ - $\beta 2/Y_{731}F$ - $\alpha 2/CDP/ATP$  reaction at 5 °C as a function of pH

*Figure S10:* The pH dependence of  $Y_{356}\bullet$  formation in the reaction of  $F_3Y_{122}\bullet$ - $\beta 2/Y_{731}F$ - $\alpha 2/CDP/ATP$  at 5 °C

*Figure S11:* Reaction of  $F_2Y_{356}$ - $\beta 2$ ,  $Y_{731}F$ - $\alpha 2$ , CDP and ATP monitored by RFQ-EPR spectroscopy

*Detailed description of data analysis using Method B.* Data analysis by Method B is demonstrated here for one trial of the temperature-dependent EPR studies of the reaction of  $F_3Y_{122}\bullet\text{-}\beta 2$  with  $Y_{731}F\text{-}\alpha 2$ , CDP and ATP. In the first step, a baseline correction was performed using the regions of the spectrum where no signal is expected (g-values  $< 1.955$  and  $> 2.051$ ). A second order polynomial function of the form  $ax^2 + bx + c$  was found to be sufficient to correct for the slight curvature of the baseline in the EPR spectra. Without this baseline correction, a systematic reduction in the calculated percentage of  $Y_{356}\bullet$  spectra from 0 to 3% was observed (see Table S1 and S2 under Method B).

In the second step, 0.5 equiv of the total  $F_3Y_{122}\bullet\text{-}\beta 2$  was subtracted from each EPR spectrum using the  $F_3Y_{122}\bullet\text{-}\beta 2$  reference spectrum.<sup>1</sup> The resulting composite spectra show the interconversion between  $F_3Y_{122}\bullet$  and  $Y_{356}\bullet$  as a function of temperature, free from the complications associated with half sites reactivity (Figure S1A-B). This subtraction decreases the S/N level of the spectra such that the relative amounts of  $F_3Y_{122}\bullet$  and  $Y_{356}\bullet$  cannot be reliably determined by eye (Figure S1C). Therefore, a script was written in Matlab 2016a to subtract the remaining  $F_3Y_{122}\bullet$  determined by adjusting the intensity of the  $F_3Y_{122}\bullet\text{-}\beta 2$  reference spectrum until the least-squares difference between the reference spectrum and the composite spectrum in the g-value interval between 2.0363 to 2.0390 (this defines the highest S/N region of the low-field  $F_3Y_{122}\bullet$  features) was minimized (Figure S1C). The amount of  $Y_{356}\bullet$  after subtraction of the remaining  $F_3Y_{122}\bullet$  was determined by double integration. The  $Y_{356}\bullet$  spectrum determined by this method shown in Figure S1D is the same in each sample, supporting the robustness of the method.

*Total spin determination: Methods A and B.* The total spin of the EPR spectra was checked by double integration to ensure that Methods A and B were not biased by spin loss artifacts. No significant spin loss was observed in any of the samples. Less than a 3% variation in the total spin was determined from EPR spectra of samples that had undergone freeze-thaw cycles at 25 °C, 2 °C, and then back to 25°C (Table S3).

TABLE S1. Temperature dependence of  $Y_{356}$  formation: hand-quench (HQ) vs rapid freeze-quench (RFQ).

| Temperature ( $^{\circ}\text{C}$ ) | HQ-Method A<br>(% $Y_{356}$ of total spin) | HQ-Method B<br>(% $Y_{356}$ of total spin) | RFQ-Method A<br>(% $Y_{356}$ of total spin) |
|------------------------------------|--------------------------------------------|--------------------------------------------|---------------------------------------------|
| 2                                  | $13 \pm 2$                                 | $17 \pm 5$                                 | 19                                          |
| 5                                  | $16 \pm 2$                                 | $21 \pm 1$                                 | 30                                          |
| 8                                  | $21 \pm 1$                                 | $24 \pm 1$                                 | -                                           |
| 10                                 | $24 \pm 1$                                 | $31 \pm 4$                                 | 36                                          |
| 12                                 | $22 \pm 2$                                 | $28 \pm 1$                                 | -                                           |
| 15                                 | $27 \pm 1$                                 | $31 \pm 2$                                 | 37                                          |
| 20                                 | $28 \pm 3$                                 | $34 \pm 4$                                 | 43                                          |
| 25                                 | $29 \pm 3$                                 | $34 \pm 5$                                 | 41                                          |
| 30                                 | $33 \pm 4$                                 | $37 \pm 3$                                 | 42                                          |
| 37                                 | $33 \pm 2$                                 | $33 \pm 1$                                 | 40                                          |

The HQ data represent the averages of three independent trials. The RFQ data represent a single trial. Analysis methods A and B are described in the main text.

TABLE S2. The pH dependence of  $Y_{356\bullet}$  formation.

| pH  | 5 °C-Method A   | 5 °C-Method B   | 25 °C-Method A  | 25 °C-Method B |
|-----|-----------------|-----------------|-----------------|----------------|
| 6.8 | - <sup>a</sup>  | 4 ± 1           | 5 ± 2           | 9 ± 1          |
| 7.0 | 5 <sup>b</sup>  | 6 ± 2           | 12 ± 1          | 14 ± 2         |
| 7.2 | 10 ± 2          | 10 <sup>b</sup> | 19 ± 1          | 30 ± 5         |
| 7.4 | 14 ± 4          | 18 ± 2          | 25 ± 2          | 36 ± 3         |
| 7.6 | 18 <sup>b</sup> | 18 ± 4          | 31 <sup>b</sup> | 35 ± 5         |
| 7.8 | 25 ± 2          | 28 ± 6          | 35 <sup>b</sup> | 42 ± 2         |
| 8.0 | 26 ± 3          | 31 ± 6          | 38 ± 3          | 43 ± 1         |

The numbers represent percentage  $Y_{356\bullet}$  of total spin. Analysis methods A and B are described in the main text.

<sup>a</sup>  $Y_{356\bullet}$  amount was < 3%.

<sup>b</sup> The two trials provided the same quantitation.

TABLE S3. Temperature dependent equilibration of  $F_3Y_{122}\bullet$  and  $Y_{356}\bullet$  in the reaction of  $F_3Y_{122}\bullet$ - $\beta_2$ , CDP, ATP and  $Y_{731}F$ - $\alpha_2$  or  $Y_{730}F$ - $\alpha_2$ .

| $\alpha_2$ mutant | 25 °C $\rightarrow$ 2 °C $\rightarrow$ 25 °C<br>(% $Y_{356}\bullet$ of total spin) |
|-------------------|------------------------------------------------------------------------------------|
| $Y_{731}F$        | 35 $\rightarrow$ 16 $\rightarrow$ 30                                               |
| $Y_{730}F$        | 26 $\rightarrow$ 12 $\rightarrow$ 30                                               |

The reaction mixture was incubated at 25 °C, frozen in liquid isopentane and analyzed by EPR spectroscopy. This same sample was subject to freeze-thaw cycles and analyzed at 2 °C and again, at 25 °C. No total spin loss was recorded with the freeze-thaw cycles. The composite spectra of each reaction are shown in Figure S7.

TABLE S4. Hyperfine values (MHz) for  $\beta$ - $^1\text{H}$  and  $^{19}\text{F}$  of  $\text{F}_2\text{Y}\cdot$  at different positions on pathway.

| Position                              | Nucleus                | $A_{xx}$ | $A_{yy}$ | $A_{zz}$ |
|---------------------------------------|------------------------|----------|----------|----------|
| $\text{F}_2\text{Y}_{122}\cdot^a$     | $\beta$ - $^1\text{H}$ | 52       | 50       | 56       |
|                                       | $^{19}\text{F}$        | 9        | 16       | 157      |
| $\text{F}_2\text{Y}_{730}\cdot^{b,c}$ | $\beta$ - $^1\text{H}$ | 63       | 63       | 63       |
|                                       | $^{19}\text{F}$        | -15      | -3       | 151      |
| $\text{F}_2\text{Y}_{731}\cdot^{b,c}$ | $\beta$ - $^1\text{H}$ | 40       | 40       | 40       |
|                                       | $^{19}\text{F}$        | -15      | -3       | 157      |
| $\text{F}_2\text{Y}_{356}\cdot^{b,d}$ | $\beta$ - $^1\text{H}$ | 54       | 52       | 54       |
|                                       | $^{19}\text{F}$        | -15      | -3       | 147      |

<sup>a</sup> Reference 1 and 2.

<sup>b</sup> The intrinsic EPR linewidth of 17 MHz was used. The hyperfine values for 2,6- $^1\text{H}$  and one of the two  $\beta$ - $^1\text{H}$  are significantly smaller than the EPR linewidth and were not included in the simulations.

<sup>c</sup>  $g$ -values of 2.0063, 2.0044 and 2.0022 were used. The simulation parameters were taken from reference 3.

<sup>d</sup>  $g$ -values of 2.0073, 2.0044 and 2.0022 were used.<sup>3</sup>

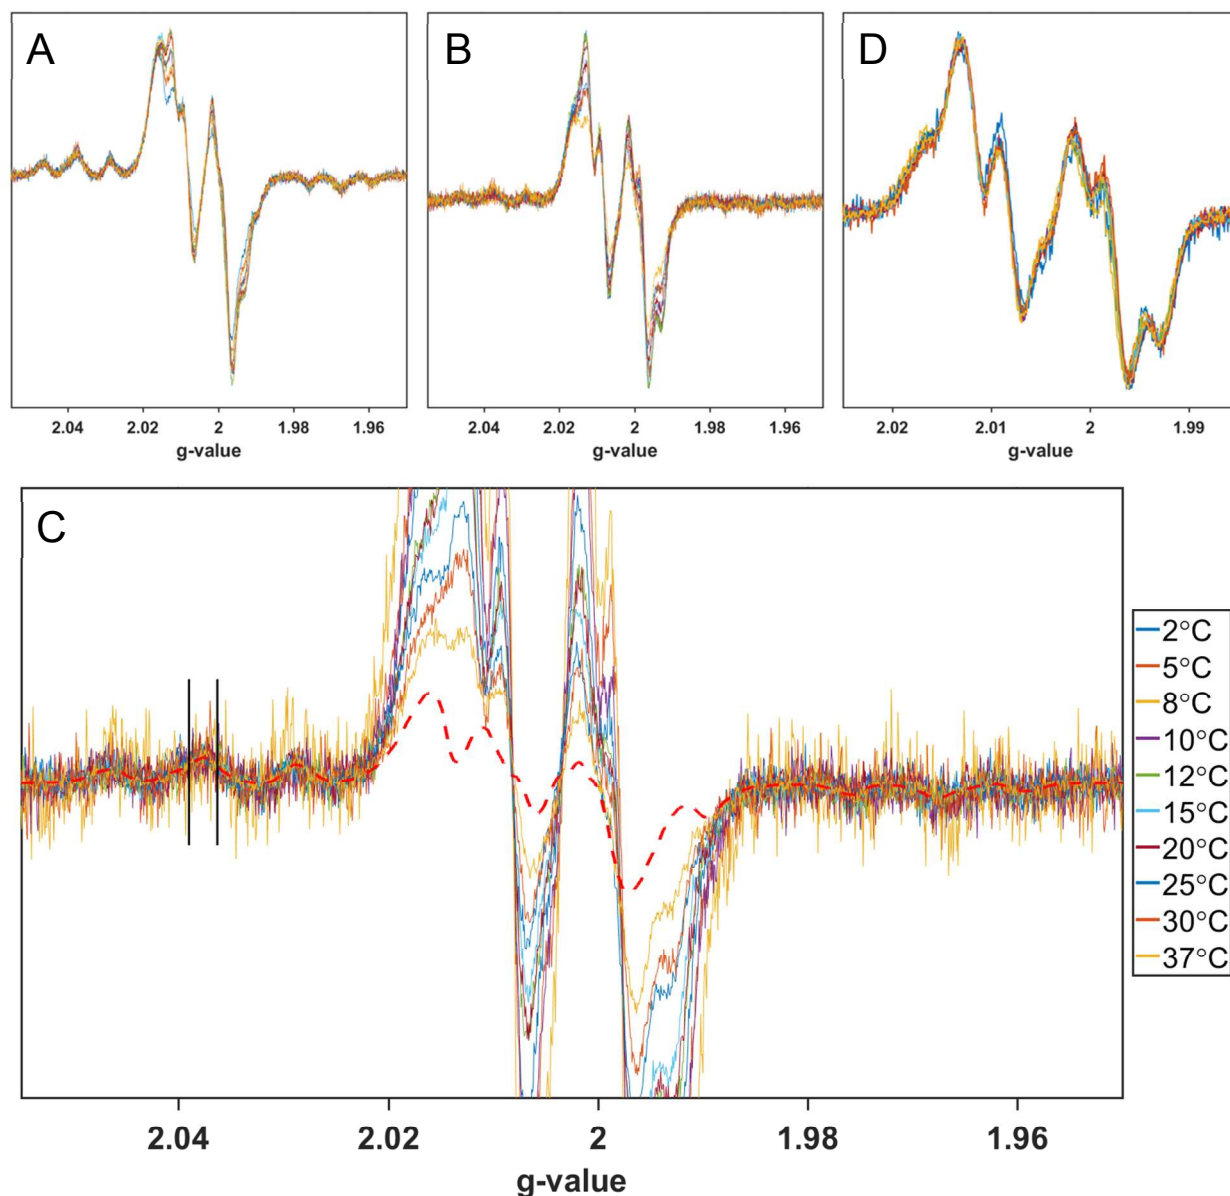

Figure S1. Analysis by Method B (main text) is described for one experiment in which the equilibration of the reaction mixture generated when  $F_3Y_{122}\cdot\text{-}\beta_2$  is incubated with  $Y_{731}F\text{-}\alpha_2$ , CDP, and ATP as a function of temperature is examined. (A) Composite spectra before subtraction of nonreacting  $F_3Y_{122}\cdot$ . (B) Composite spectra after subtracting the nonreacting  $F_3Y_{122}\cdot$  which shows the interconversion between  $F_3Y_{122}\cdot$  and  $Y_{356}\cdot$  as a function of temperature. (C) Least-squares fitting of the  $F_3Y_{122}\cdot\text{-}\beta_2$  reference spectrum (red dashed line) to the composite spectra in the g-value range 2.0363 to 2.0390 (marked by two vertical black lines). (D) Overlay of  $Y_{356}\cdot$  spectra generated after subtraction of the remaining  $F_3Y_{122}\cdot$  in (C) at different temperatures. The intensities of the spectra were normalized for visual comparison. At 2 °C (blue trace) the spectrum is slightly distorted relative to the other difference spectra. This observation is likely a consequence of the lower amount of  $Y_{356}\cdot$  signal at this temperature.



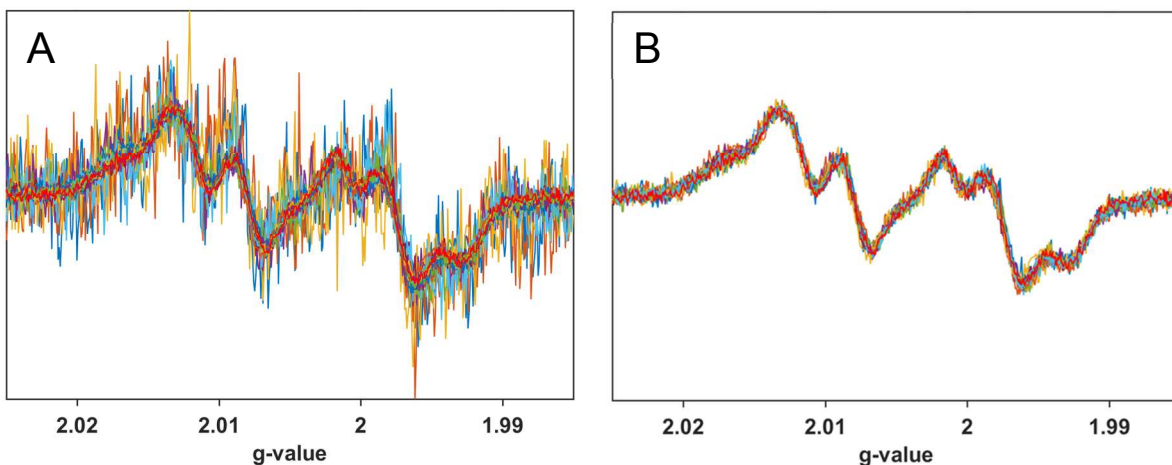

Figure S2. Analysis by Method B (main text) for the equilibration of the reaction mixture generated when  $F_3Y_{122}\bullet\text{-}\beta 2$  is incubated with  $Y_{731}F\text{-}\alpha 2$ , CDP, and ATP as a function of pH at 25 °C. (A) All spectra from pH 6.8 to 8.0 are included. (B) Only spectra from pH 7.2 to 8.0 are included as the level of the  $Y_{356}\bullet$  at the low pHs are very low.

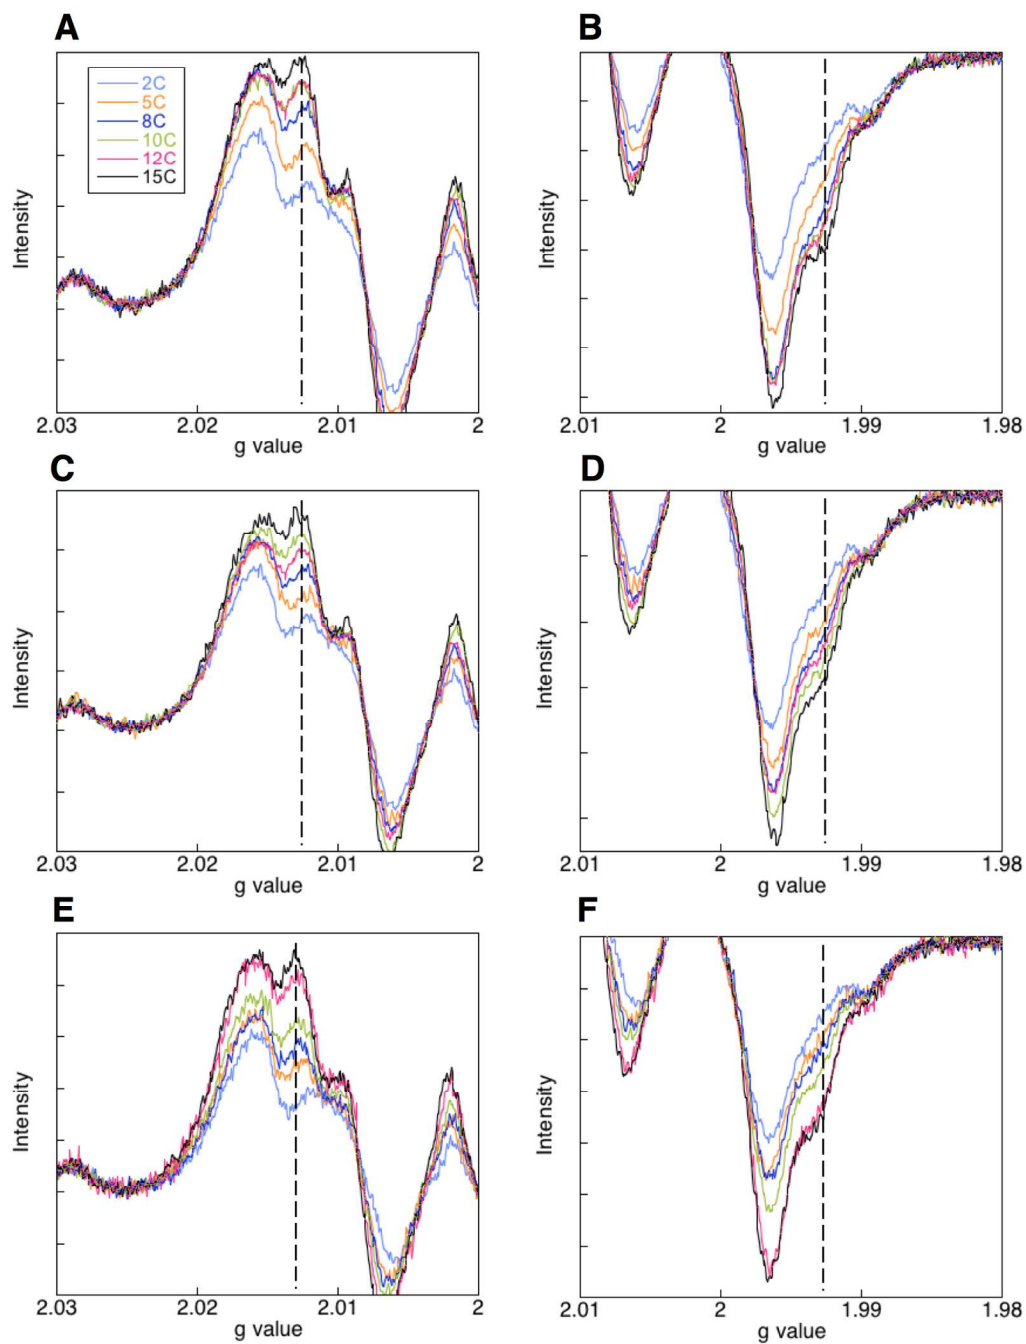

FIGURE S3. Composite EPR spectra of the  $F_3Y_{122}\bullet\text{-}\beta_2/Y_{731}F\text{-}\alpha_2/CDP/ATP$  reaction as a function of temperature (2–15 °C). The composite spectrum at each temperature was acquired on three independently prepared samples. The low- and high-field regions of the spectra for trial 1 (A and B), trial 2 (C and D) and trial 3 (E and F) are shown. The color code is described in panel A. The dotted lines identify spectral features that are characteristic of  $Y_{356}\bullet$ . Trial 1 is also shown in Figure 3 of the main text.

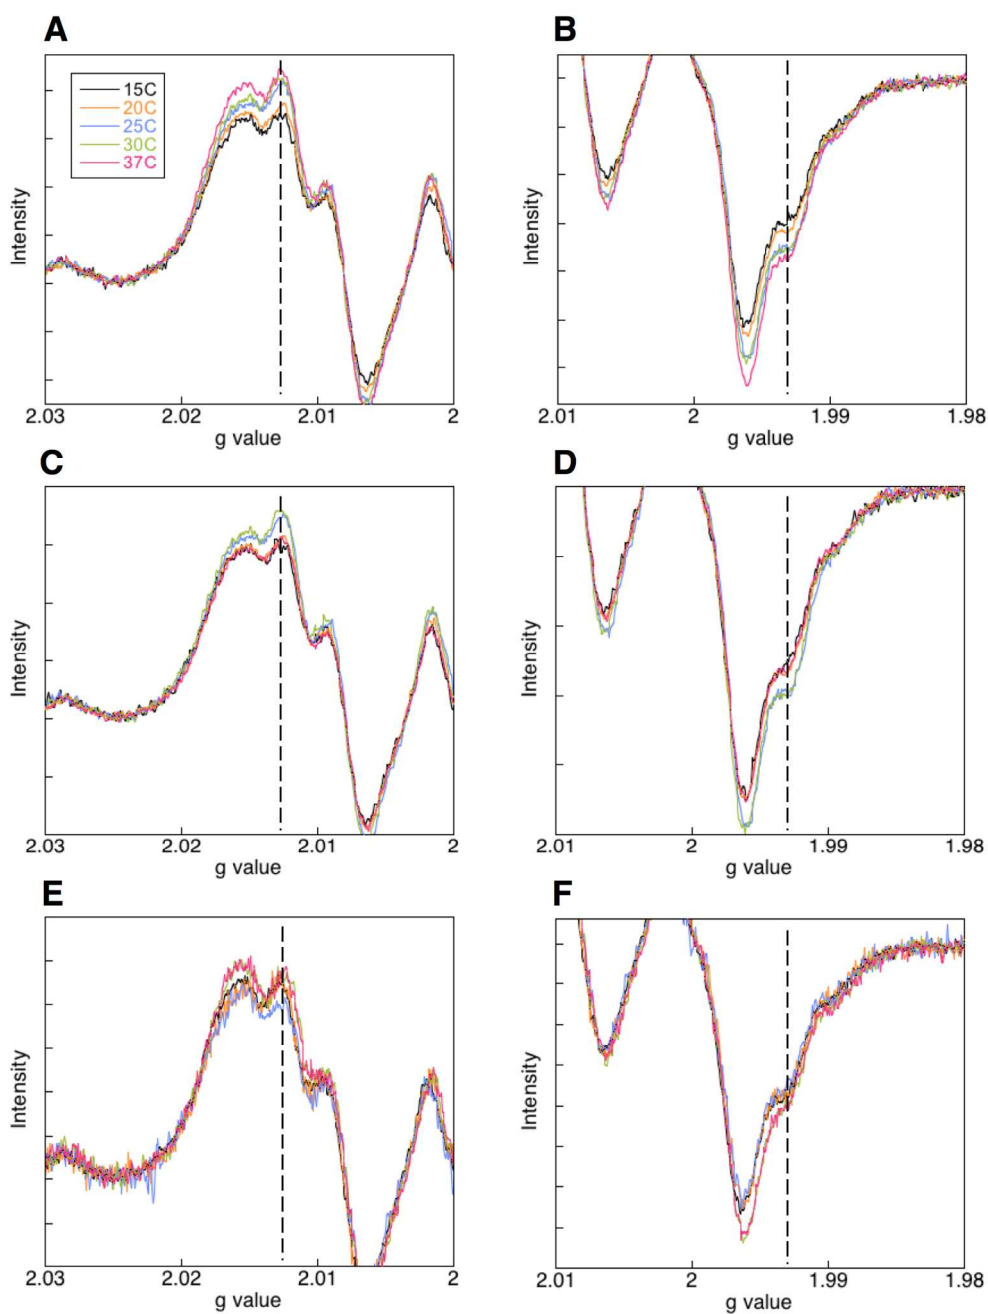

FIGURE S4. Composite EPR spectra of the  $F_3Y_{122}\bullet\text{-}\beta_2/Y_{731}F\text{-}\alpha_2/CDP/ATP$  reaction as a function of temperature (15–37 °C). The composite spectrum at each temperature was acquired on three independently prepared samples. The low- and high-field regions of the spectra for trial 1 (A and B), trial 2 (C and D) and trial 3 (E and F) are shown. The color code is described in panel A. The dotted lines identify spectral features that are characteristic of  $Y_{356}\bullet$ .

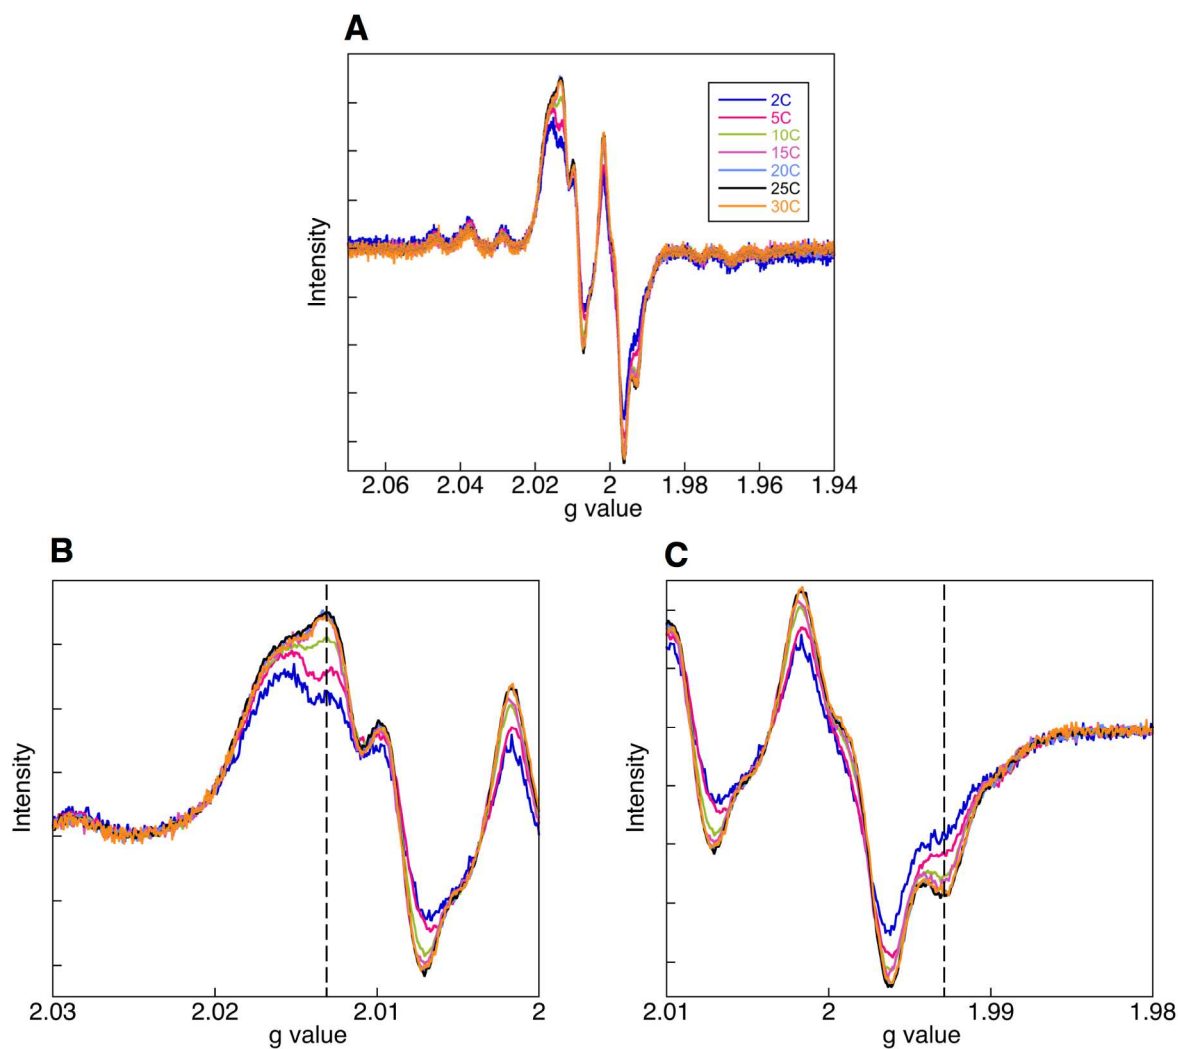

FIGURE S5. Temperature dependence of  $Y_{356}\bullet$  formation monitored by RFQ-EPR spectroscopy. The composite EPR spectra recorded upon reacting  $F_3Y_{122}\bullet\text{-}\beta 2$  ( $0.8 F_3Y\bullet/\beta 2$ , final concentration  $35 \mu\text{M}$ ),  $Y_{731}F\text{-}\alpha 2$  ( $35 \mu\text{M}$ ), CDP ( $1 \text{ mM}$ ) and ATP ( $3 \text{ mM}$ ) are shown in A. B and C. Expanded views of the low- and high-field regions of the spectra respectively. The color code is described in panel A.

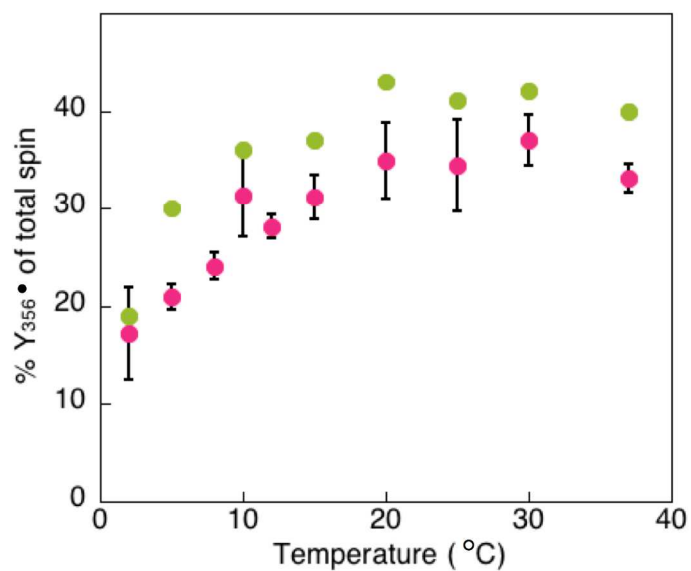

FIGURE S6. Temperature dependence of  $Y_{356}\bullet$  formation in the reaction of  $F_3Y_{122}\bullet\text{-}\beta_2/Y_{731}F\text{-}\alpha_2/CDP/ATP$  as determined by HQ- and RFQ-EPR spectroscopies. The HQ data points (pink dots) represent the averages of three independent trials. The RFQ data points (green dots) represent a single trial.

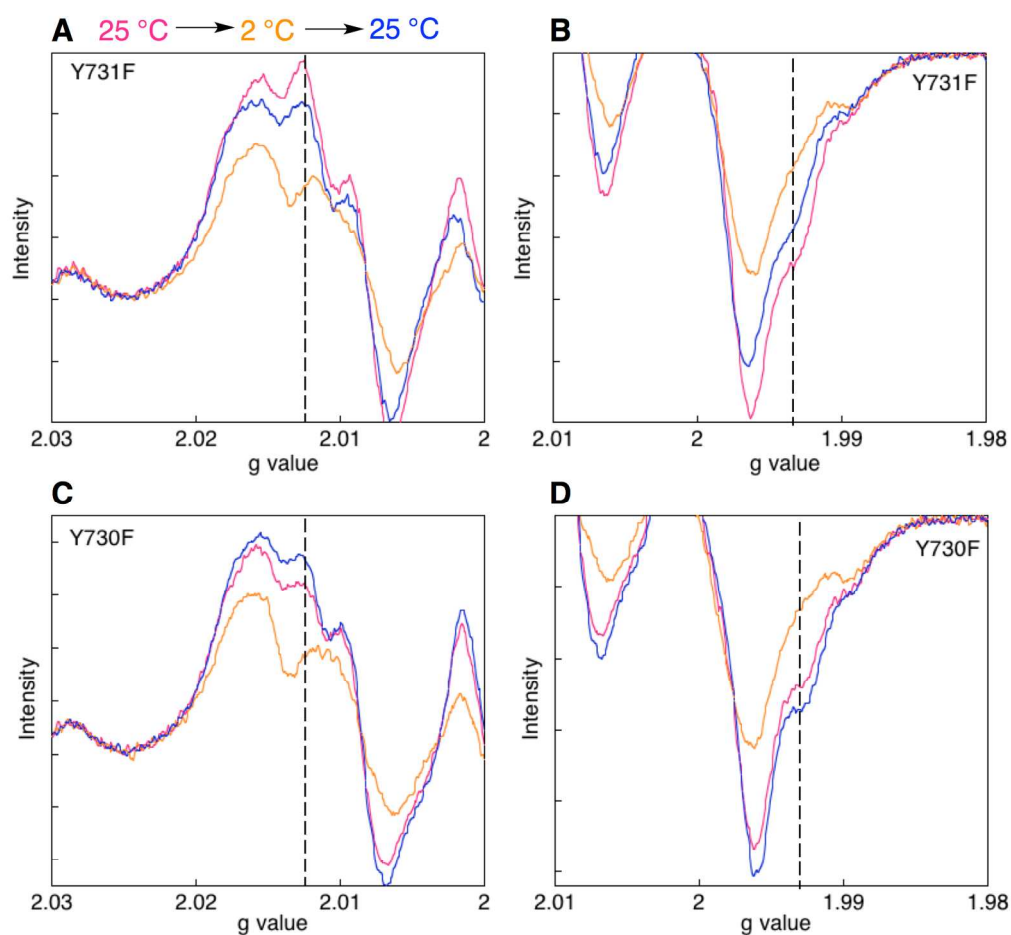

FIGURE S7. Temperature dependent equilibration of  $F_3Y_{122}\bullet$  and  $Y_{356}\bullet$  in the reaction of  $F_3Y_{122}\bullet$ - $\beta 2$ , CDP, ATP and  $Y_{731}F$ - $\alpha 2$  or  $Y_{730}F$ - $\alpha 2$ . Expanded views of the low- and high-field regions of the spectra for  $Y_{731}F$ - $\alpha 2$  (A and B) and  $Y_{730}F$ - $\alpha 2$  (C and D). The color code is described in panel A. In each case, the reaction was initiated at 25 °C and the spectrum was recorded (pink). The sample was subsequently thawed, incubated in a water bath set at 2 °C and re-frozen for EPR analysis (orange). The reaction mixture was thawed a third time, incubated in a 25 °C water bath and re-frozen for EPR analysis (blue). The percentage  $Y_{356}\bullet$  for each spectrum is shown in Table S3. No spin loss was recorded during the freeze-thaw cycles.

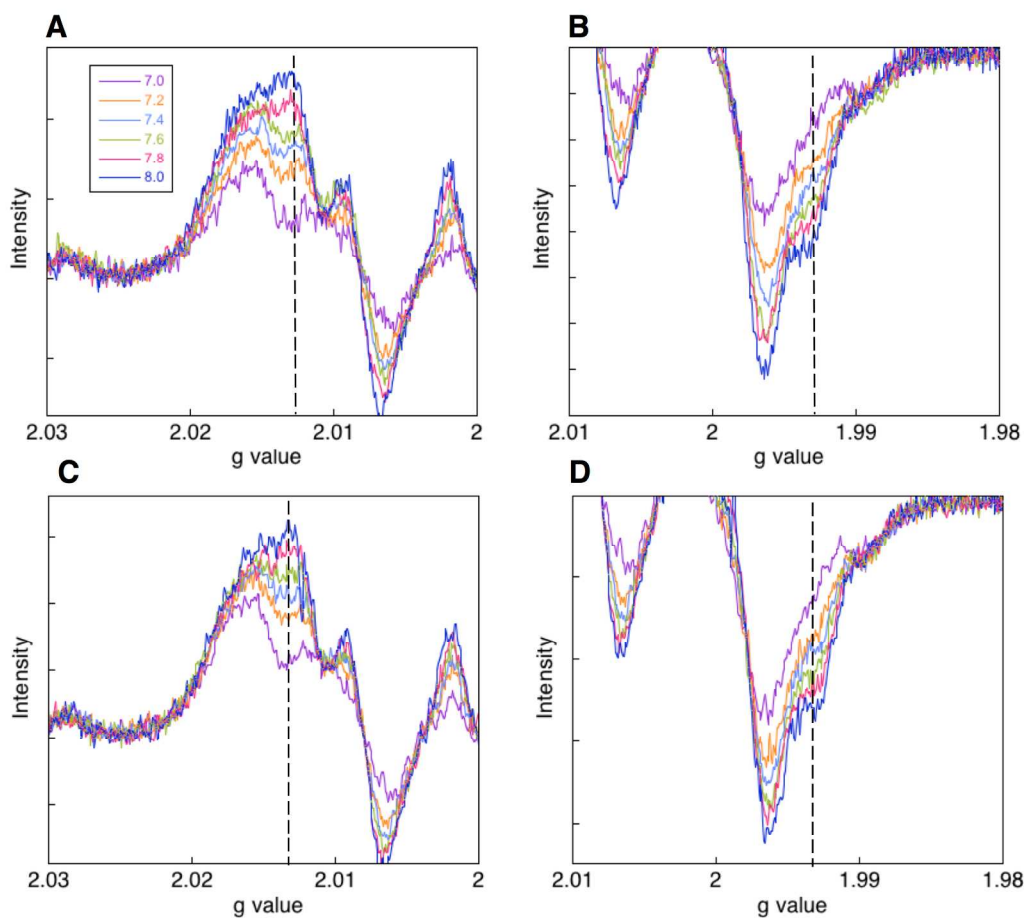

FIGURE S8. Composite EPR spectra of the  $F_3Y_{122}\bullet\text{-}\beta_2/Y_{731}F\text{-}\alpha_2/CDP/ATP$  reaction at 25 °C as a function of pH. The composite spectrum at each pH was acquired on two independently prepared samples. The low- and high-field regions of the spectra for trial 1 (A and B) and trial 2 (C and D) are shown. The colors represent different pH values as described in panel A. The dotted lines identify spectral features that are characteristic of  $Y_{356}\bullet$ . Trial 1 is reproduced from the main text (Figure 5).

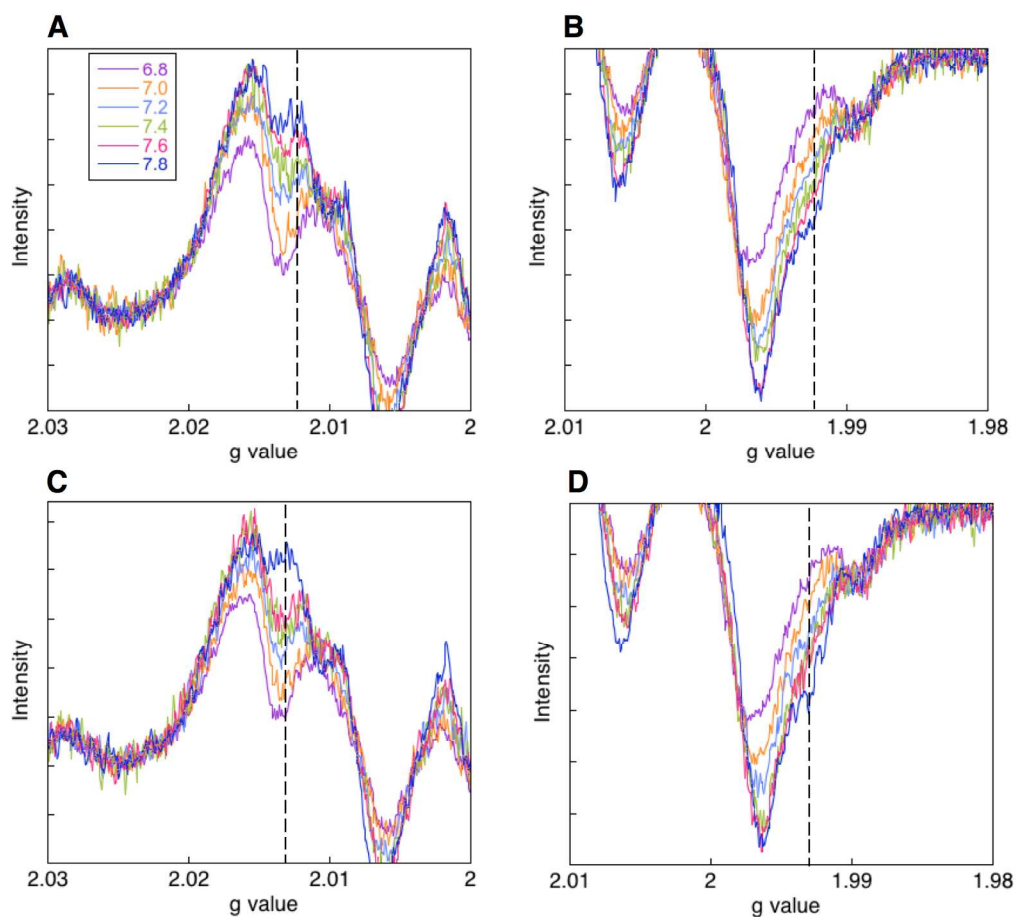

FIGURE S9. Composite EPR spectra of the  $F_3Y_{122}\bullet\text{-}\beta_2/Y_{731}F\text{-}\alpha_2/CDP/ATP$  reaction at 5 °C as a function of pH. The composite spectrum at each pH was acquired on two independently prepared samples. The low- and high-field regions of the spectra for trial 1 (A and B) and trial 2 (C and D) are shown. The colors represent different pH values as described in panel A. The dotted lines identify spectral features that are characteristic of  $Y_{356}\bullet$ .



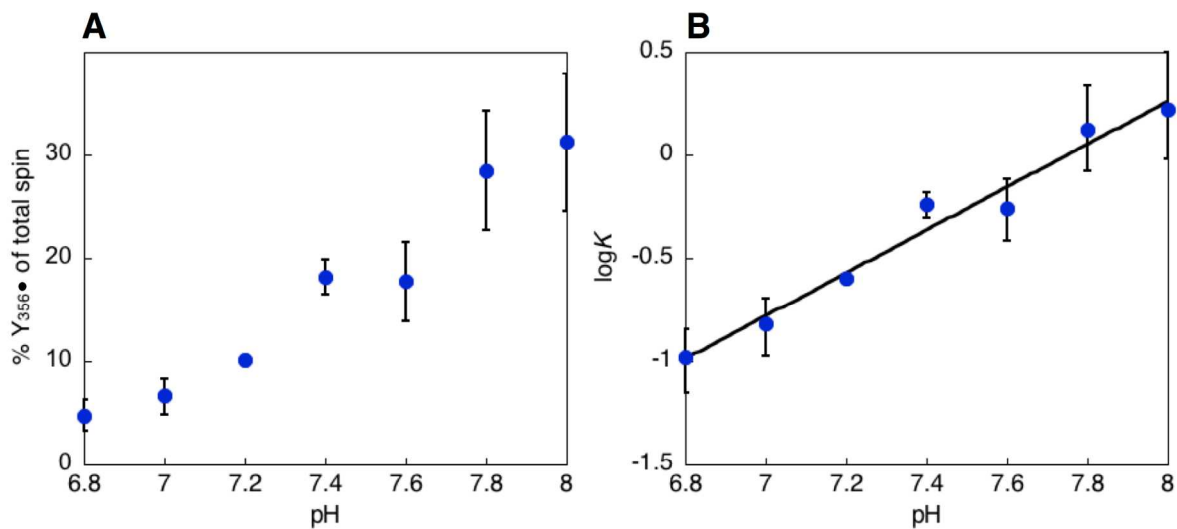

FIGURE S10. The pH dependence of  $Y_{356}\bullet$  formation in the reaction of  $F_3Y_{122}\bullet$ - $\beta_2/Y_{731}F$ - $\alpha_2/CDP/ATP$  at 5 °C. A. Percentage  $Y_{356}\bullet$  of total spin as a function of pH. B. The  $\log K$  as a function of pH where  $K$  is the ratio of  $Y_{356}\bullet$  to  $F_3Y_{122}\bullet$ . The observed pH dependence of slope  $1.0 \pm 0.1$  supports that the  $Y_{356}\bullet$  proton is in fast exchange with solvent.

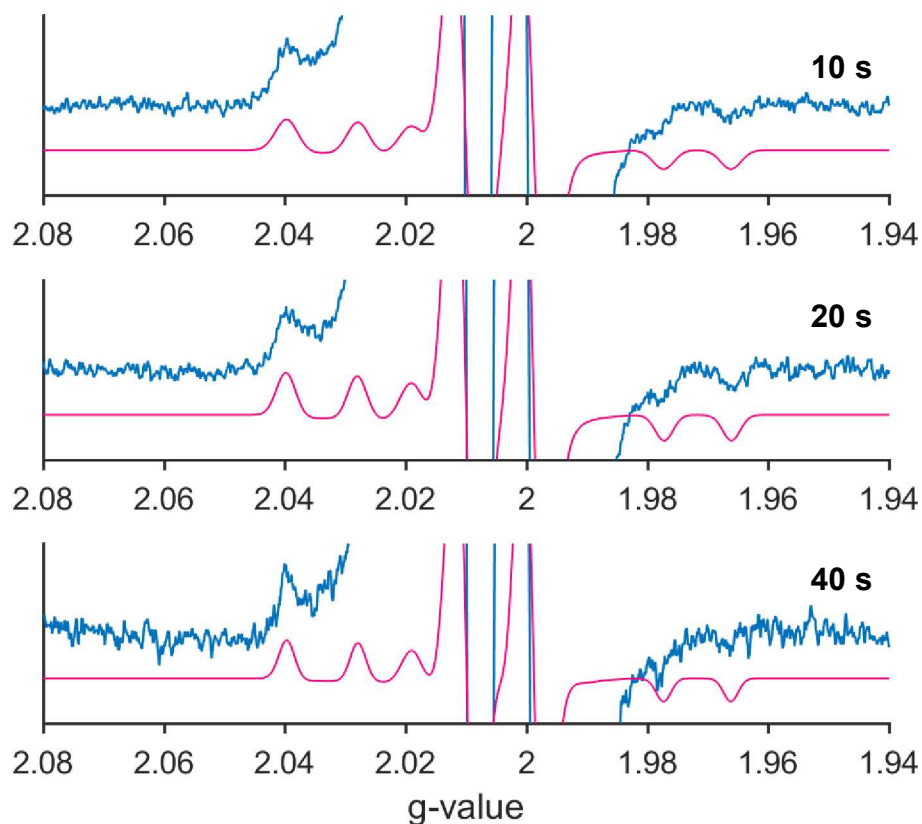

FIGURE S11. Reaction of  $F_2Y_{356}\text{-}\beta 2$ ,  $Y_{731}F\text{-}\alpha 2$ , CDP and ATP monitored by RFQ-EPR spectroscopy. An expanded view of the composite spectra recorded at the indicated time points shows wing features that are assigned to  $F_2Y_{356}^\bullet$ . The pink trace in each panel represents the simulated spectrum of  $F_2Y_{356}^\bullet$  using the parameters shown in Table S4. The 20 s data set is also reproduced in the main text (Figure 7).

## REFERENCES

- (1) Minnihan, E. C.; Young, D. D.; Schultz, P. G.; Stubbe, J. *J. Am. Chem. Soc.* **2011**, *133*, 15942-5.
- (2) Oyala, P. H.; Ravichandran, K. R.; Funk, M. A.; Stucky, P.; Stich, T. A.; Drennan, C. L.; Britt, R. D.; Stubbe, J. *J. Am. Chem. Soc.* **2016**, *138*, 7951-64.
- (3) Yokoyama, K.; Smith, A. A.; Corzilius, B.; Griffin, R. G.; Stubbe, J. *J. Am. Chem. Soc.* **2011**, *133*, 18420-32.
